# Supplementary material for: Kelp and dolphin gulls cause perineal wounds in South American fur seal pups (Arctocephalus australis) at Guafo Island, Chilean Patagonia
Source: R Soc Open Sci. 2017 Jul 26;4(7):170638. doi: 10.1098/rsos.170638 (PMC5541573; doi:10.1098/rsos.170638)
Supplement: perineal wounds safs.txt [file rsos170638supp1.xlsx]

## Sheet: Sheet1
year	Pup N	Sex	Date	Weight	Total length	BMI	Per.wounds	Blood feces	Conjunctivitis	Coughing	Mucus	RBC	PCV	Hg	PT	WBC	hw.eggs	Neut	Band	lymph	Mac	Eos	baso
2017	98	Female	2016-12-30	4.9	60	0.0816667	1	1	0	0	0	4220000	46	15.7	9	22185	1	11758	2884.05	3549.6	3549.6	443.7	0
2017	101'	Male	2017-01-04	8.1	72	0.1125	1	0	0	0	0	3830000	33	10.6	8.2	16290	0	8145	651.6	3909.6	1303.2	1466.1	814.5
2017	82'	Female	2017-01-19	8.3	77	0.107792	1	0	0	0	0	4530000	36	11.9	4.7	8730	0	4539.6	611.1	2269.8	785.7	436.5	87.3
2017	140	Female	2017-01-19	5	64	0.078125	1	1	0	0	0	4040000	22	7.4	8.1	22050	22	9040.5	3087	4630.5	3528	1543.5	220.5
2017	156	Female	2017-02-07	6.6	68	0.0970588	1	1	0	0	0	5660000	32	9.7	8.3	15120	0	7711.2	1209.6	3780	604.8	1814.4	0
2017	163	Female	2017-02-07	5.2	64	0.08125	1	0	0	1	0			8.1			14
2017	182	Female	2017-02-10	9.8	81	0.120988	1	0	0	0	0	6020000	36	10.2	9.8	13365	0	6014.25	267.3	3742.2	1470.15	1737.45	133.65
2017	197	Female	2017-02-10	6.2	69	0.0898551	1	0	0	0	0	2850000	32	9.5	9.4	14535	7	7848.9	1017.45	3924.45	1162.8	581.4	0
2017	131'	Male	2017-02-19	8.2	69	0.118841	1	0	0	0	0	4000000	36	9.8	9.2	14175	0	5953.5	283.5	4961.25	708.75	1559.25	708.75
2017	161'	Female	2017-02-23	6.8	79	0.0860759	1	1	0	0	0	4680000	28	6	9.6	43470	0	18692.1	1304.1	21735	869.4	869.4	0
2013	69	Female	2013-02-04	9.8	66	0.148485	1	0	0	1	1	3080000	37	8.8	8	31600	16	11376	948	11692	4740	2844	0
2013	71	Male	2013-02-04	10.2	70	0.145714	1	0	0	0	0	4780000	40	12	7.5	22000	0	7480	660	9240	3300	1320	0
2013	76	Male	2013-02-04	11	73	0.150685	1	1	0	0	0	3660000	37	10.4	7	24000	1	12480	960	5040	2160	2880	480
2013	78	Male	2013-02-10	9.2	73	0.126027	1	0	0	0	0	3080000	40	10.8	7.7	15000	4
2013	133	Female	2013-03-03	10.8	78	0.138462	1	0	0	0	0	3520000	36	11.1	6.9	14400	0	6624	432	3456	3168	720	0
2014	P33	Male	2014-01-05	5.4	62	0.0870968	1	0	1	0	0	3630000	0.21	11.6	7	25000	1
2014	P96	Female	2014-01-13	6.9	63	0.109524	1	0	0	0	0			11.9			1
2014	P110	Male	2014-01-21	9.2	71	0.129577	1	0	0	0	0	3930000	0.34	10.9	6.2	15200	2	10640	0	3800	0	760	0
2014	P114	Female	2014-01-21	5.8	61	0.095082	1	0	0	0	1	5070000	0.4	13.2	5.9	19800	1	14850	396	2376	594	1584	0
2014	P30	Male	2014-01-23	8	68	0.117647	1	1	0	0	0	3330000	0.28	8.6	6.1	17200	7
2014	P119	Male	2014-01-25	7.5	70	0.107143	1	1	0	0	0	3720000	0.43	9.5	6.3	20800	0	12480	416	6656	208	1040	0
2014	P114	Female	2014-02-06	6.5	67	0.0970149	1	0	0	0	0	4600000	0.32	10.1	6.7	25600	0
2016	49	Male	2016-02-14	5.6	68	0.0823529	1	0	0	0	0	3620000	37	10.1	9	12573	1
2016	92	Female	2016-02-22	6.7	73	0.0917808	1	1	0	0	0	2560000	32	8.5	9.8	18216	6	8743.68	2185.92	4918.32	1457.28	910.8	0
2016	94	Male	2016-02-22	8.6	79	0.108861	1	0	0	0	0	3260000	36	10.6	8.8	20839.5	1	11253.3	2500.74	4793.09	1667.16	625.185	0
2016	N3	Female	2016-02-22	5.6	71	0.0788732	1	0	0	0	0			12.1			1
2016	102	Female	2016-02-24	7.2	66	0.109091	1	1	0	0	0	1360000	17	7.9	10	16582.5	0
2016	107	Female	2016-02-26	10.8	75	0.144	1	0	0	0	0	4050000	38	11.8	8.8	34254	0
2015	41	Female	2014-12-30	5	61	0.0819672	1	1	0	0	0	4360000	51	8.2	8.2	12177	0	8402.13	974.16	2191.86	121.77	487.08	0
2015	65	Male	2015-01-04	5.8	61	0.095082	1	1	1	0	0	2970000	30	9.8	7.6	16533	11	8266.5	826.65	4959.9	165.33	2314.62	0
2015	50'	Male	2015-01-17	5.2	61	0.0852459	1	1	0	0	0	2370000	28	7.1	5.8	18315	55
2015	18''	Male	2015-02-12	8	79	0.101266	1	0	0	0	0	3970000	30	10.3	10.2	20988	0
2015	23'''	Female	2015-02-12	7.4	67	0.110448	1	1	0	0	1	3210000	32	9.9	9.8	17127	0
2012	12	Female	2012-01-30	6	67	0.0895522	1	1	0	0	0
2012	19	Female	2012-01-31	6.9	66	0.104545	1	0	0	0	0
2012	23	Female	2012-01-31	7.6	73	0.10411	1	1	0	0	0
2012	75	Female	2012-02-06	7.6	73	0.10411	1	0	0	0	0
2012	80	Male	2012-02-21	11	80	0.1375	1	0	0	0	0
2012	86	Male	2012-02-21	9	77	0.116883	1	0	0	0	0
2014	P76	Female	2014-01-08	4.6	58	0.0793103	1	1	0	0	0	4020000	0.14	6	3.8	55000	56	32450	550	18150	550	3300
2014	P80	Male	2014-01-11	6.7	68	0.0985294	1	1	0	0	0	1070000	0.16	6.2	4.6	23000	14	14720	920	6900	0	460
2014	P20	Male	2014-01-26	9.2	68	0.135294	1	1	0	0	1	3150000	0.3	9	5	28800	2	14976	0	9792	288	3744
2015	93''	Male	2015-02-08	5.4	63	0.0857143	1	0	1	0	0	2980000	24	6.1	8.8	20542	12
2013	123	Female	2013-03-01	11.2	75	0.149333	1	1	0	0	1	3920000	38	10.4	6.9	20600	1	12772	206	6180	1030	412	0
2013	84	Male	2013-02-10	7.4	70	0.105714	1	0	0	0	0		25	6.2	8.1	24200	21
2016	62	Male	2016-02-18	12	83	0.144578	1	1	0	0	0	3910000	32	10.9	9.2	21681	5	8021.97	2818.53	7154.73	1084.05	2384.91
2016	96	Female	2016-02-24	10.8	77	0.14026	1	0	0	0	1	3700000	36	9.5	8.6	19206	0	8066.52	1344.42	7682.4	1344.42	768.24
2013	44	Male	2013-01-27	8.5	71	0.119718	0	0	0	0	0	6850000	43	13.3	7	8400	0	3612	0	2688	1428	672	0
2013	45	Male	2013-01-27	9.5	71	0.133803	0	0	0	0	0	4600000	41	13.5	7.6	19600	0	9800	588	4900	3332	980	0
2013	54	Female	2013-02-04	8.5	71	0.119718	0	0	0	0	0	3610000	40	13.1	7.9	14400	0	4896	288	5616	2880	720	0
2013	55	Female	2013-02-04	8.4	75	0.112	0	0	0	0	0	4370000	38	12.5	7.1	21000	1	9030	210	5040	3360	3360	0
2013	57	Female	2013-02-04	8.1	68	0.119118	0	0	0	0	0	4700000	41	13.8	7.3	25000	0	14000	500	4000	4500	2000	0
2013	64	Male	2013-02-04	9.5	74	0.128378	0	0	0	0	0	3270000	40	12.5	6.9	16200	1	5022	0	4536	2106	4212	324
2013	80	Male	2013-02-10	10.2	77	0.132468	0	0	0	0	0	4350000	41	11.7	8	16600	1	7304	166	3652	2490	2988	0
2013	104	Female	2013-02-28	7.6	72	0.105556	0	0	0	0	0	5410000	42	13	7.5	18600	0	10788	558	3348	3348	558	0
2013	105	Male	2013-02-28	11	79	0.139241	0	0	0	0	0	3820000	42	13.7	6.8	12000	0	4080	480	4800	1920	720	0
2013	118	Male	2013-03-01	14	79	0.177215	0	0	0	0	0	4740000	41	12.5	7	16200	0	8424	0	4698	972	2106	0
2014	P58	Female	2013-12-30	5	62	0.0806452	0	0	0	0	0	4120000	0.48	15.5	7	16000	1	12000	160	2880	160	800	0
2014	P71	Female	2014-01-05	6.4	63	0.101587	0	0	0	0	0	4620000	0.5	14.8	8.2	18000	0	15480	180	900	360	1080	0
2014	P75	Male	2014-01-08	6.9	65	0.106154	0	0	0	0	0	4940000	0.42	12.1	6.8	14800	0	11100	148	3108	148	296	0
2014	P74	Male	2014-01-08	5.4	64	0.084375	0	0	0	0	0	2880000	0.3	11.1	5.6	22400	10	16800	672	3136	0	1792	0
2014	P35	Male	2014-01-08	6.1	64	0.0953125	0	1	0	0	0	4710000	0.4	10.4	6.4	18800	5	14100	1128	2256	188	1128	0
2014	P87	Male	2014-01-13	9.7	76	0.127632	0	0	0	0	0	3350000	0.42	12.9	6.9	11600	1	5452	0	5336	232	580	0
2014	P88	Male	2014-01-13	7.5	67	0.11194	0	0	0	0	0	5980000	0.42	12.5	6.2	15800	2	10428	0	4108	0	1264	0
2014	P89	Male	2014-01-13	7.5	66	0.113636	0	0	0	0	0	6350000	0.4	13.3	6.4	17400	1	12180	348	4524	174	174	0
2014	P93	Female	2014-01-13	6.9	69	0.1	0	0	0	0	0	3880000	0.36	13.4	6.6	15200	2	8512	152	5320	0	1216	0
2014	P98	Female	2014-01-13	7.3	59	0.123729	0	0	0	0	0	4840000	0.48	13.4	6.6	23000	1	12650	0	7590	460	2300	0
2014	P99	Male	2014-01-13	7.5	65	0.115385	0	0	0	0	0	4590000	0.4	12.2	7.4	27800	5	16124	278	9730	0	1668	0
2014	P120	Male	2014-01-25	6.9	70	0.0985714	0	0	0	0	0	3240000	0.36	11.8	6.9	16600	12	5644	0	7968	0	2988	0
2014	P121	Female	2014-01-25	8.4	73	0.115068	0	0	0	0	0	3800000	0.39	11.3	6.9	17600	4	13376	0	3344	0	880	0
2015	65'	Male	2015-01-25	9.1	77	0.118182	0	0	0	0	1	5080000	36	11.6	8.2	18166	0	9809.64	544.98	4359.84	2724.9	726.64	0
2015	25'	Female	2015-02-01	6.2	68	0.0911765	0	0	0	0	0	5170000	39	12.4	8.5	15246	0	9604.98	457.38	3811.5	304.92	1067.22	0
2015	3''	Female	2015-02-01	5.8	72	0.0805556	0	1	0	0	0	2710000	25	8.8	7	41877	9	16750.8	2512.62	15913.3	1256.31	5444.01	0
2015	92''	Female	2015-02-12	8	79	0.101266	0	0	0	0	1	3740000	34	11.7	9.6	15939	0
2015	52''''	Female	2015-02-12	8	73	0.109589	0	0	0	0	1	4180000	34	11.2	8.8	14009	3
2016	95	Female	2016-02-24	12.1	72	0.168056	0	0	1	0	0	3650000	36	11.1	8.6	15889.5	2
2016	96	Female	2016-02-24	10.8	77	0.14026	0	0	0	1	1	3700000	36	9.5	8.6	19206	0
2016	97	Male	2016-02-24	6.5	70	0.0928571	0	0	0	0	1	2710000	32	10.8	8.4	14652	1
2016	103	Female	2016-02-24	8.4	75	0.112	0	0	0	0	0	3110000	37	9.9	9.8	11781	0
2016	104	Male	2016-02-24	10.9	86	0.126744	0	0	0	1	0	4750000	42	11.1	8.6	19057.5	0
2016	105	Female	2016-02-24	5.8	66	0.0878788	0	0	0	0	0	3620000	37	13	9.4	16731	0
2016	106	Male	2016-02-26	11.9	82	0.145122	0	0	0	0	0	3920000	45	12.3	10	14652	0
2017	7''	Male	2017-01-21	9.5	77	0.123377	0	0	0	0	0	4960000	32	15.8	8.8	13365	0	7350.75	534.6	2272.05	2806.65	400.95	0
2017	128''	Female	2017-01-23	7.3	71	0.102817	0	0	1	0	0	2440000	22	6.7	8.6	16380	2	7862.4	819	5241.6	982.8	1474.2	0
2017	38''	Male	2017-01-23	6.8	73	0.0931507	0	0	0	0	0	5220000	42	14.8	7.3	14310	0
2017	160	Male	2017-02-07	9.7	78	0.124359	0	0	0	0	0	3310000	30	8.4	9.5	10755	0	6560.55	322.65	2151	1290.6	430.2
2017	161	female	2017-02-07	7.2	71	0.101408	0	0	0	1	0	3250000	33	8.7	9.8	17460	1	6285.6	1047.6	7333.2	1396.8	1396.8
2017	189	Male	2017-02-10	9.1	77	0.118182	0	0	0	0	0	3260000	34	10.4	9.1	8505	3	3061.8	255.15	4337.55	680.4	170.1
2017	190	Female	2017-02-10	9	80	0.1125	0	0	0	0	0	3370000	36	13.5	9.8	11565	0	6823.35	346.95	2197.35	2081.7	115.65
2017	191	Male	2017-02-10	8.6	79	0.108861	0	0	0	0	0	2830000	30	7.2	8.8	10845	10	5747.85	325.35	3145.05	542.25	1084.5
2017	192	Female	2017-02-10	8.5	76	0.111842	0	0	0	0	0	2940000	32	10.8	8.9	14040	0	8283.6	561.6	3369.6	1123.2	702
2017	193	Male	2017-02-10	11.5	82	0.140244	0	0	0	0	0	3130000	32	11.6	9.3	12645	0	8472.15	252.9	3287.7	252.9	379.35
